# Supplementary material
Source: PubMed Central journal article supplement (PMC6925600)
Supplement: NIHMS1514272-supplement-2.pdf [file NIHMS1514272-supplement-2.pdf]

## Reporting Summary

Nature Research wishes to improve the reproducibility of the work that we publish. This form provides structure for consistency and transparency in reporting. For further information on Nature Research policies, see [Authors & Referees](#) and the [Editorial Policy Checklist](#).

### Statistical parameters

When statistical analyses are reported, confirm that the following items are present in the relevant location (e.g. figure legend, table legend, main text, or Methods section).

n/a Confirmed

- The exact sample size ( $n$ ) for each experimental group/condition, given as a discrete number and unit of measurement
- An indication of whether measurements were taken from distinct samples or whether the same sample was measured repeatedly
- The statistical test(s) used AND whether they are one- or two-sided  
*Only common tests should be described solely by name; describe more complex techniques in the Methods section.*
- A description of all covariates tested
- A description of any assumptions or corrections, such as tests of normality and adjustment for multiple comparisons
- A full description of the statistics including central tendency (e.g. means) or other basic estimates (e.g. regression coefficient) AND variation (e.g. standard deviation) or associated estimates of uncertainty (e.g. confidence intervals)
- For null hypothesis testing, the test statistic (e.g.  $F$ ,  $t$ ,  $r$ ) with confidence intervals, effect sizes, degrees of freedom and  $P$  value noted  
*Give  $P$  values as exact values whenever suitable.*
- For Bayesian analysis, information on the choice of priors and Markov chain Monte Carlo settings
- For hierarchical and complex designs, identification of the appropriate level for tests and full reporting of outcomes
- Estimates of effect sizes (e.g. Cohen's  $d$ , Pearson's  $r$ ), indicating how they were calculated
- Clearly defined error bars  
*State explicitly what error bars represent (e.g. SD, SE, CI)*

*Our web collection on [statistics for biologists](#) may be useful.*

### Software and code

Policy information about [availability of computer code](#)

Data collection

no software was used. Data are publicly available.

Data analysis

R version 3.4.3  
PLINK 1.9  
samtools 1.3.1  
bedtools 2.27.1  
ADMIXTURE 1.3.0  
vcftools 0.1.14  
Code is available on [https://github.com/makovalab-psu/Mito\\_nuclear\\_incompatibility](https://github.com/makovalab-psu/Mito_nuclear_incompatibility)

For manuscripts utilizing custom algorithms or software that are central to the research but not yet described in published literature, software must be made available to editors/reviewers upon request. We strongly encourage code deposition in a community repository (e.g. GitHub). See the Nature Research [guidelines for submitting code & software](#) for further information.

## Data

Policy information about [availability of data](#)

All manuscripts must include a [data availability statement](#). This statement should provide the following information, where applicable:

- Accession codes, unique identifiers, or web links for publicly available datasets
- A list of figures that have associated raw data
- A description of any restrictions on data availability

All analyses were conducted using publicly available data. The 1000 Genomes Project data are available on their ftp site. Intermediate files and code have also been made publicly available on github: ([https://github.com/makovalab-psu/Mito\\_nuclear\\_incompatibility](https://github.com/makovalab-psu/Mito_nuclear_incompatibility)).

## Field-specific reporting

Please select the best fit for your research. If you are not sure, read the appropriate sections before making your selection.

Life sciences       Behavioural & social sciences       Ecological, evolutionary & environmental sciences

For a reference copy of the document with all sections, see [nature.com/authors/policies/ReportingSummary-flat.pdf](https://nature.com/authors/policies/ReportingSummary-flat.pdf)

## Life sciences study design

All studies must disclose on these points even when the disclosure is negative.

|                 |                                                                                                                                                                                                                                                                                                                                       |
|-----------------|---------------------------------------------------------------------------------------------------------------------------------------------------------------------------------------------------------------------------------------------------------------------------------------------------------------------------------------|
| Sample size     | No sample size calculations were carried out. We analyzed publicly available data. As a result, we were restricted to the sample size of this dataset. We carried out simulations to test whether the available sample sizes provide sufficient power for analyses. These are detailed in the paper.                                  |
| Data exclusions | Some of the data points were excluded. Specifically, we removed samples which were sequenced from blood samples, as opposed to lymphoblastoid cell lines, to limit heterogeneity in tissue type. This is described in more detail in the manuscript.                                                                                  |
| Replication     | This is an exploratory study and was limited by the sample size available. Thus, no explicit replication experiments were carried out. However, there are implicit replications in our experimental setup. For example, the association between ancestry and mtDNA copy number is independently reproducible across mtDNA haplotypes. |
| Randomization   | As this is an observational study, experimental randomization is not applicable.                                                                                                                                                                                                                                                      |
| Blinding        | As this is an observational study, blinding (w.r.t treatment) is not applicable.                                                                                                                                                                                                                                                      |

## Reporting for specific materials, systems and methods

### Materials & experimental systems

|                                     |                                                                 |
|-------------------------------------|-----------------------------------------------------------------|
| n/a                                 | Involved in the study                                           |
| <input checked="" type="checkbox"/> | <input type="checkbox"/> Unique biological materials            |
| <input checked="" type="checkbox"/> | <input type="checkbox"/> Antibodies                             |
| <input checked="" type="checkbox"/> | <input type="checkbox"/> Eukaryotic cell lines                  |
| <input checked="" type="checkbox"/> | <input type="checkbox"/> Palaeontology                          |
| <input checked="" type="checkbox"/> | <input type="checkbox"/> Animals and other organisms            |
| <input type="checkbox"/>            | <input checked="" type="checkbox"/> Human research participants |

### Methods

|                                     |                                                 |
|-------------------------------------|-------------------------------------------------|
| n/a                                 | Involved in the study                           |
| <input checked="" type="checkbox"/> | <input type="checkbox"/> ChIP-seq               |
| <input checked="" type="checkbox"/> | <input type="checkbox"/> Flow cytometry         |
| <input checked="" type="checkbox"/> | <input type="checkbox"/> MRI-based neuroimaging |

## Human research participants

Policy information about [studies involving human research participants](#)

|                            |                                                                                                                                                                                                               |
|----------------------------|---------------------------------------------------------------------------------------------------------------------------------------------------------------------------------------------------------------|
| Population characteristics | Our analyses are based on samples of admixed ancestry, which are part of the 1,000 Genomes Project Dataset. The samples derive their ancestry from Native American, European, and African source populations. |
| Recruitment                | These samples were collected by the 1,000 Genomes Project Group. The data are publicly available.                                                                                                             |
